# Supplementary material
Source: PubMed Central journal article supplement (PMC4001372)
Supplement: supp_tpc.113.122002_tpc122002Supplemental.pdf [file supp_tpc.113.122002_tpc122002Supplemental.pdf]

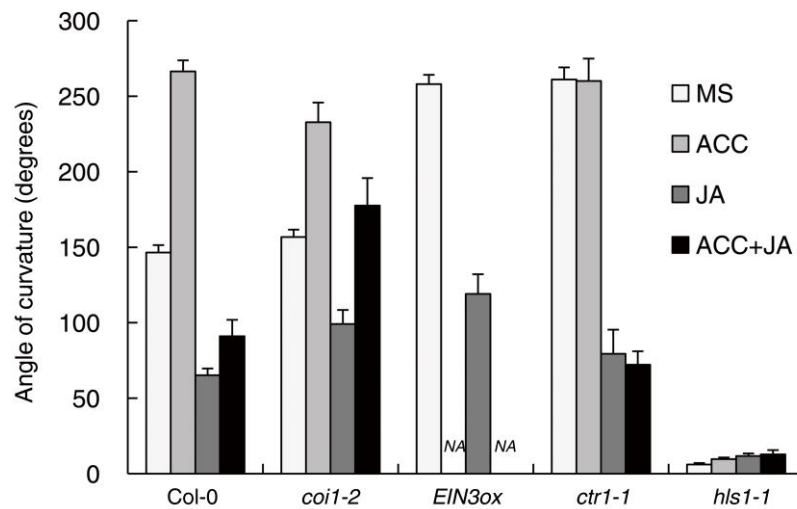

**Supplemental Figure 1: JA represses ET-induced hook formation.**

Quantification of hook angles in three-day-old etiolated seedlings grown on MS, 10  $\mu$ M ACC, 50  $\mu$ M JA, or 10  $\mu$ M ACC plus 50  $\mu$ M JA medium. Growth of *EIN3ox* was strongly inhibited on ACC medium and the hook angles were difficult to measure. NA, not available. This experiment was independently repeated twice with similar results. Mean  $\pm$  s.e.m,  $n=20$ .

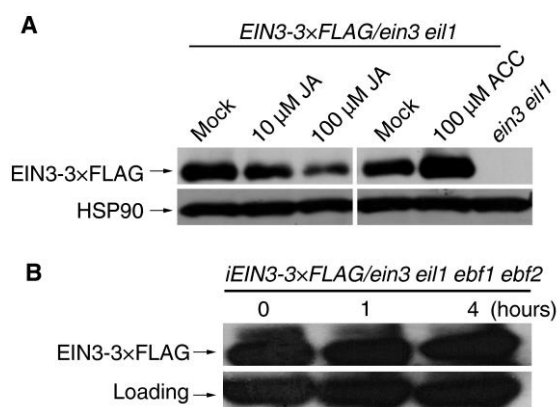

**Supplemental Figure 2:** JA represses EIN3 accumulation in a manner that is dependent on SCF<sup>EBF1/2</sup>.

- (A) Five-day-old light-grown seedlings (*35S:EIN3-3 × FLAG/ein3 eil1*) were treated with the indicated concentrations of hormones for 4 h. Protein extracts were probed with anti-EIN3 or anti-HSP90 antibody. Arrows define the corresponding protein.
- (B) JA does not alter the levels of EIN3 in *ein3 eil1 ebf1 ebf2*. Transgenic plants harboring estradiol-inducible EIN3-3 × FLAG (*iEIN3-3 × FLAG*) in the *ein3 eil1 ebf1 ebf2* background were first pre-treated with 10  $\mu$ M  $\beta$ -estradiol for 4 h and then with 100  $\mu$ M JA for additional periods. Protein extracts were probed with anti-FLAG antibody to detect EIN3 abundance. A cross-reacting non-specific band was used as the loading control. Arrows define the corresponding protein.

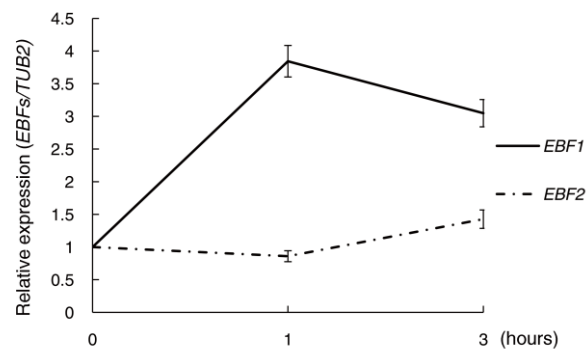

**Supplemental Figure 3:** JA induces *EBF1* expression but not *EBF2* expression.

Three-day-old etiolated seedlings of Col-0 were treated with the indicated concentrations of JA for 1 h or 3 h. The relative expression of *EBF1* and *EBF2* was detected and normalized to *TUB2*. Mean  $\pm$  s.d.,  $n = 3$ .

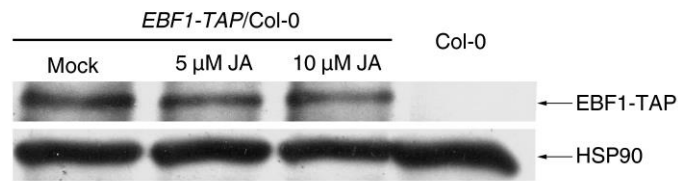

**Supplemental Figure 4:** The protein stability of EBF1 is not affected by JA treatment.

Three-day-old etiolated seedlings (*35S:EBF1-TAP/Col-0*) grown on MS medium were treated with the indicated concentration of JA for 4 h. Protein extracts were probed with anti-MYC or anti-HSP90 antibody. Protein extracts from Col-0 were used as the negative control. Arrows define the corresponding protein.

**A**

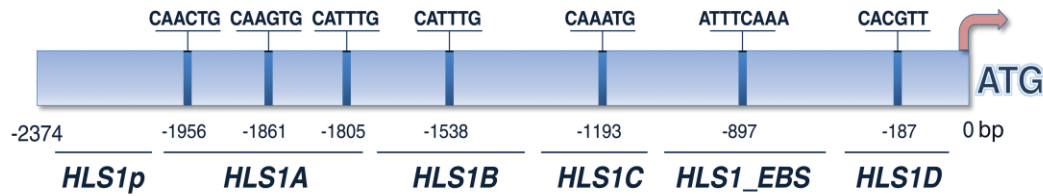

**B**

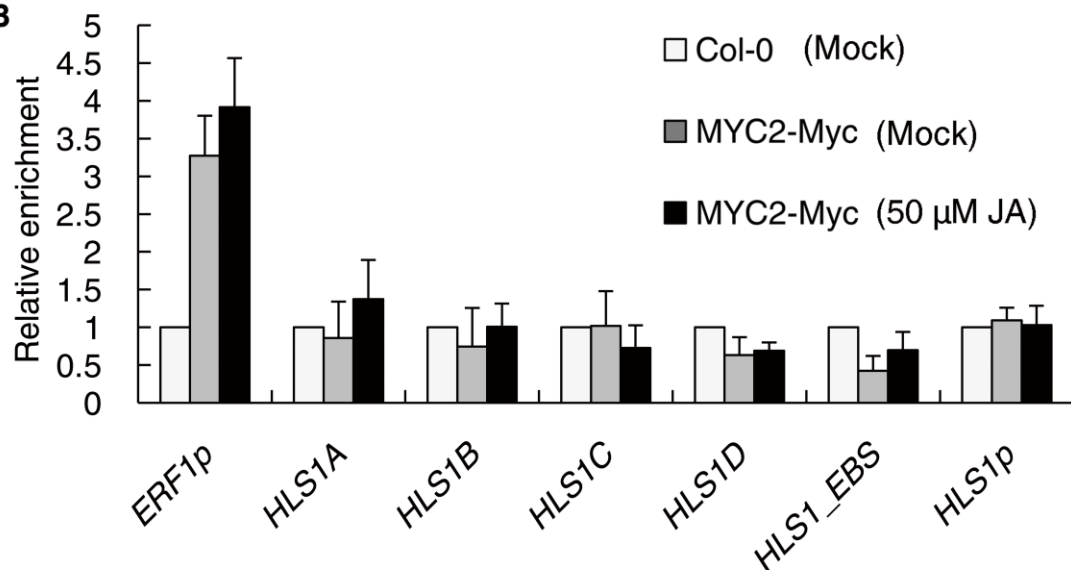

**Supplemental Figure 5.** MYC2 does not bind to the *HLS1* promoter *in vivo*.

- (A) Sequence analysis of the *HLS1* promoter showed five E-box motifs and a putative MYC2-binding site (*HLS1D*). The EIN3-binding site in the *HLS1* promoter (*HLS1\_EBS*) is also illustrated. The pink arrow defines the transcription initiation site of the *HLS1*.
- (B) ChIP assay against MYC2-Myc showed that none of the *HLS1* promoter fragments listed above was enriched by MYC2. Plant materials were collected under the same conditions as described in Figure 5C. Relative enrichment of the *HLS1* promoter fragment was normalized with *ACT2*. Mean  $\pm$  s.d., n=3.

**Supplemental Table 1.** Primer sequences used in this study

| Locus Name | Alias     | Primer  | Sequence (5'-3')                      | Purpose   |
|------------|-----------|---------|---------------------------------------|-----------|
| At4g37580  | HLS1      | Forward | CACGGTTATCAAGTTAGAGC                  | qRT-PCR   |
|            |           | Reverse | GAAAGTCCCAAGCGAGA                     |           |
| At2g25490  | EBF1      | Forward | TGTGTGGGCTCAAGGGGATAACAG              | qRT-PCR   |
|            |           | Reverse | CCGTTACGAGCAGTGATGGCAG                |           |
| At5g62690  | TUB2      | Forward | GAGCCTTACAACGCTACTCTGTCTGTC           | qRT-PCR   |
|            |           | Reverse | ACACCAGACATAGTAGCAGAAATCAAG           |           |
| At3g23240  | ERF1p     | Forward | AAGAGATACAATGTCCAGGTTTG               | ChIP-qPCR |
|            |           | Reverse | TTTATTCTTTCTTAAGCCCATCC               |           |
| At2g25490  | EBF1-MBS1 | Forward | AAGAATTTGTATGTTCATC                   | ChIP-qPCR |
|            |           | Reverse | CGACTGATGACAAATTTTG                   |           |
| At2g25490  | EBF1-MBS2 | Forward | TGATCTTGCGTACCCAATTG                  | ChIP-qPCR |
|            |           | Reverse | GTCAGCATCGTTTATGTTG                   |           |
| At4g37580  | HLS1A     | Forward | GGGGTACCTGTTATATATTTTGAGGGGCCACG      | ChIP-qPCR |
|            |           | Reverse | CGCTCGAGTGGAACAATAAGCCTCAAGCC         |           |
| At4g37580  | HLS1B     | Forward | GGGGTACCTGATGATCTTTCACACCTAATGAAGTGTC | ChIP-qPCR |
|            |           | Reverse | CGCTCGAGACTGCAATGTTCAAATTCACCTACGAGG  |           |
| At4g37580  | HLS1C     | Forward | GGGGTACCTCCTCTTGCAAAATTAGAGCTGCTG     | ChIP-qPCR |
|            |           | Reverse | CGCTCGAGTCTACTACTAGTTCCTTCCTTTGC      |           |
| At4g37580  | HLS1D     | Forward | ATCCAAATCCTATAAACTCATAGC              | ChIP-qPCR |
|            |           | Reverse | ATTTGTTGAGAGGAAAGAGAAGC               |           |
| At4g37580  | HLS1_EBS  | Forward | CCACATCAATGCTCGTCTTA                  | ChIP-qPCR |
|            |           | Reverse | CAGTGGCGCTATCTATTTTC                  |           |
| At4g37580  | HLS1p     | Forward | TCAATCAAATAATGATAATCGTTGATAGTTC       | ChIP-qPCR |
|            |           | Reverse | ACAAATCGATATAAGATTGAACGTAAAG          |           |
